1 **Comparative genomics identified a genetic locus in plant-associated *Pseudomonas* spp. that**  
2 **is necessary for induced systemic susceptibility**

3 Polina Beskrovnaya<sup>1#</sup>, Ryan A. Melnyk<sup>1#</sup>, Zhexian Liu<sup>1</sup>, Yang Liu<sup>1</sup>, Melanie A. Higgins<sup>2</sup>, Yi  
4 Song<sup>1,3</sup>, Katherine Ryan<sup>2</sup>, and Cara H. Haney<sup>1,4\*</sup>

5  
6 **Affiliations:**

7 <sup>1</sup>Department of Microbiology and Immunology, The University of British Columbia, Vancouver,  
8 Canada V6T 1Z3

9 <sup>2</sup>Department of Chemistry, The University of British Columbia, Vancouver, Canada V6T 1Z1

10 <sup>3</sup>State Key Laboratory of Genetic Engineering and Fudan Institute of Plant Biology, School of  
11 Life Sciences, Fudan University, Shanghai, China, 200438

12 <sup>4</sup>Michael Smith Laboratories, The University of British Columbia, Vancouver, Canada V6T 1Z3

13

14 <sup>#</sup>These authors contributed equally. Author ordered was determined alphabetically.

15

16 \*Correspondence: [cara.haney@mssl.ubc.ca](mailto:cara.haney@mssl.ubc.ca)

17

## 18 **Abstract**

19 Plant root-associated microbes promote plant growth and induce systemic resistance  
20 (ISR) to foliar pathogens. In an attempt to find novel growth-promoting and ISR-inducing  
21 strains, we previously identified strains of root-associated *Pseudomonas* spp. that promote plant  
22 growth but unexpectedly induced systemic susceptibility (ISS) rather than ISR to foliar  
23 pathogens. Here we demonstrate that the ISS-inducing phenotype is common among root-  
24 associated *Pseudomonas* spp. Using comparative genomics, we identified a single *P. fluorescens*  
25 locus that is unique to ISS strains. We generated a clean deletion of the 11-gene ISS locus and  
26 found that it is necessary for the ISS phenotype. Although the functions of the predicted genes in  
27 the locus are not apparent based on similarity to genes of known function, the ISS locus is  
28 present in diverse bacteria and a subset of the genes have previously been implicated in  
29 pathogenesis in animals. Collectively these data show that a single bacterial locus contributes to  
30 modulation of systemic plant immunity.

31

## 32 **Importance**

33 Microbiome-associated bacteria can have diverse effects on health of their hosts, yet the genetic  
34 and molecular basis of these effects have largely remained elusive. This work demonstrates that  
35 a novel bacterial locus can modulate systemic plant immunity. Additionally, this work  
36 demonstrates that growth promoting strains may have unanticipated consequences on plant  
37 immunity and this is critical to consider when engineering the plant microbiome for agronomic  
38 improvement.

39

40 **Keywords:** rhizosphere, microbiome, induced systemic susceptibility, *Pseudomonas*,  
41 *Arabidopsis*

## 42 **Introduction**

43 Plant growth promotion by beneficial microbes has long been of interest because of the  
44 potential to improve crop yields. Individual root-associated microbial strains can promote plant  
45 growth by facilitating nutrient uptake, producing plant hormones, or improving resilience to both  
46 abiotic and biotic stresses (1). In some cases, single bacterial loci underlie beneficial effects of  
47 microbes on plants, while other traits appear to be complex and polygenic.

48 *Pseudomonas fluorescens* and related species are a model for beneficial host-associated  
49 microbes due to their genetic tractability and robust host-association across diverse eukaryotic  
50 hosts. Direct plant growth promotion (PGP) by *Pseudomonas* spp. can be mediated by bacterial  
51 production of the phytohormones auxin (2) or by the expression of 1-aminocyclopropane-1-  
52 carboxylate (ACC) deaminase that metabolizes plant-derived ethylene (1, 3). Indirect PGP  
53 through antimicrobial activity and pathogen suppression has been attributed to production of the  
54 antibiotic 2,4-diacetylphloroglucinol (DAPG) (4). However, the molecular basis of many traits  
55 such as induced systemic resistance (ISR) has remained elusive, and multiple distinct bacterial  
56 traits including production of siderophores, LPS, and salicylic acid have all been implicated (5).

57 We previously reported two *Pseudomonas* spp. that induce systemic susceptibility (ISS)  
58 on *Arabidopsis* and can promote growth under nutrient limiting conditions (6, 7). These same  
59 *Pseudomonas* strains suppress a subset of salicylic acid (SA)-dependent responses and promote  
60 resistance to herbivores (7). Although it is possible that ISS-inducing strains contain multiple  
61 genetic loci that affect plant growth and pathogen resistance, we hypothesized that a single  
62 bacterial trait may be responsible for both the growth and immunity phenotypes of ISS strains.

63 Growth and immunity have a reciprocal relationship in plants, leading to growth-defense  
64 tradeoffs to the extent that plant stunting has been used as a proxy for autoimmunity (8). As a  
65 result, we hypothesized that suppression of plant immunity by *Pseudomonas* strains that trigger  
66 ISS may be a consequence of PGP activity. The genomes of ISS strains do not contain genes for  
67 the ACC deaminase enzyme prevalent in other *Pseudomonas* PGP strains (3); thus, we  
68 hypothesized that there may be a distinct mechanism of growth promotion in these strains.

69 Because of the high density of sampling and genome sequencing within *P. fluorescens*  
70 and related species, we reasoned that if ISS is an overlooked consequence of growth promotion  
71 then: 1) we should be able to identify additional ISS strains by sampling known PGP strains and  
72 additional root-associated strains, and 2) assuming a single unique locus was responsible, that a  
73 comparative genomics approach should reveal the underlying genetic basis of ISS.

74 Here we report that ISS is relatively common among *Pseudomonas* strains within the *P.*  
75 *fluorescens* species complex. We identified new ISS isolates including previously described PGP  
76 or environmental isolates and new isolates from *Arabidopsis* roots. Using comparative genomics,  
77 we identified a single bacterial locus that is unique to *Pseudomonas* ISS strains. We show that  
78 the putative ISS locus is necessary to elicit ISS. While the function of genes in the locus remains  
79 elusive, a subset have previously been implicated in pathogenesis, and we found that the locus  
80 contributes to rhizosphere growth. Collectively, these data indicate that a single microbial locus  
81 contributes to a systemic immune response in a plant host.

82

## 83 **Results**

84 **ISS is a common feature of growth-promoting *Pseudomonas* spp.**

85 We previously reported that two strains of *Pseudomonas* (CH229 and CH267) induce systemic  
86 susceptibility (ISS) to the foliar pathogen *Pseudomonas syringae* pv. tomato DC3000 (*Pto*)  
87 under conditions where a well-characterized ISR strain [*P. simiae* WCS417 (9)] conferred  
88 resistance to *Pto* (6, 7). To the best of our knowledge, descriptions of *Pseudomonas*-elicited ISS  
89 against bacterial pathogens are limited to *Pseudomonas* sp. CH229 and CH267, strains that were  
90 independently isolated from the rhizospheres of wild *Arabidopsis* plants in Massachusetts, USA.  
91 We reasoned that if ISS is common among *Arabidopsis*-associated *Pseudomonas* spp., we would  
92 be able to identify additional ISS strains from *Arabidopsis* roots from plants growing at distinct  
93 sites.

94 We isolated 25 new fluorescent pseudomonads from wild-growing *Arabidopsis* plants  
95 from additional sites in Massachusetts and in Vancouver, Canada. We generated ~800 bp  
96 sequences of a region of the 16S rRNA gene where strains CH229 and CH267 are 99.5%  
97 identical, but each shares only <96% identity to the well-characterized ISR strain WCS417.  
98 Reasoning that new ISS strains would be closely related to CH267 and CH229, we selected 3  
99 new isolates [1 from Massachusetts (CH235) and 2 from British Columbia (PB101 and PB106)]  
100 that were >97% identical to CH267 by 16S rRNA sequence and another 3 (from British  
101 Columbia: PB100, PB105 and PB120) that were <97% identical to CH229 and CH267 (Fig. S1).  
102 We tested these 6 new rhizosphere *Pseudomonas* isolates for their ability to trigger ISS.

103 Consistent with the hypothesis that ISS may be common among closely-related PGP  
104 *Pseudomonas*, we found that 2 of the 3 strains that were most closely related to CH267 (CH235  
105 and PB101) elicited ISS (Fig. 1). Two strains with <96% identity to CH267 failed to trigger ISS:  
106 PB105 triggered ISR and PB100 had no effect on systemic defenses (Fig. 1). PB106 and PB120  
107 consistently enhanced susceptibility in all experiments, but to a more moderate degree (\*p<0.1).

108 Collectively, these data indicate that the ability to elicit ISS on *Arabidopsis* ecotype Col-0 may  
109 be a common feature among some, but not all, closely-related strains of *Pseudomonas* spp.  
110 isolated from the *Arabidopsis* rhizosphere.

111 Because ISS seemed restricted to strains that were closely related to CH267, we obtained  
112 several additional isolates with similar 16S rRNA sequences including *Pseudomonas* sp. UW4,  
113 *Pseudomonas* sp. Pf0-1, and *P. vancouverensis* DhA-51. We also tested a growth promoting  
114 strain, *Pseudomonas* sp. WCS365 that is more distantly related and to our knowledge has not  
115 been tested for ISR/ISS (Table 1). We found that UW4 and DhA-51 elicited ISS while Pf0-1 and  
116 WCS365 did not (Fig. 1). *Pseudomonas* sp. UW4 (10) and WCS365 are well-characterized  
117 growth promoting strains. *Pseudomonas* sp. Pf0-1 (11) is an environmental isolate. *Pseudomonas*  
118 *vancouverensis* DhA-51 is also an environmental isolate (12) and was previously shown to be  
119 closely related to Pf0-1 (13). Because DhA-51 is an environmental isolate that triggers ISS, these  
120 data show that the ability to trigger ISS is not specific to rhizosphere isolates.

121 To gain insights into the distinguishing features of ISS strains, we sequenced the  
122 genomes of the 6 new isolates (CH235, PB100, PB101, PB105, PB106 and PB120) from  
123 *Arabidopsis* roots as well as *P. vancouverensis* DhA-51 (UW4, WCS365, CH267 and CH229  
124 have been sequenced previously). Whole genome sequencing was used to assemble draft  
125 genomes (Methods). We generated a phylogenetic tree using 122 conserved genes as described  
126 previously (7, 14). We found that all ISS strains are closely related to one another and fall within  
127 a monophyletic group which corresponds to the *P. koreensis*, *P. jessenii*, and *P. mandelii*  
128 subgroups of *P. fluorescens* identified in a recent phylogenomic survey of *Pseudomonas* spp.  
129 [Fig. 2B; (15)]. However, not every isolate in this clade is an ISS strain; notably Pf0-1, which  
130 has no effect on systemic immunity despite being closely related to CH229. We reasoned that the

131 absence of the ISS phenotype in Pf0-1 should facilitate the use of comparative genomics by  
132 allowing us to separate the phylogenetic signature from the phenotypic signature of ISS.

133

### 134 **11 genes in a single genomic locus are unique to ISS strains and predicts ISS**

135 To identify the potential genetic basis of the ISS phenotype, we used a previously described  
136 database of orthologous genes for *Pseudomonas* spp. (14) to identify genes that are present in  
137 ISS strains (CH229, CH235, CH267 and UW4) but are absent in the closely-related strain that  
138 has no effect on systemic defenses (Pf0-1). We used only the ISS strains with the most robust  
139 phenotypes for this analysis. We identified 29 predicted protein-coding genes absent in Pf0-1 but  
140 present in all of the other strains. Of these, 12 were small (<100 aa) hypothetical proteins. The  
141 remaining 17 predicted protein-coding genes were prioritized for further analysis and are shown  
142 in S1 Table. Intriguingly, 11 of the 17 ISS unique genes are found in a single genomic locus.

143 We surveyed the genomes of other *Pseudomonas* strains tested for ISS to determine if the  
144 presence of the 17 genes identified by our comparative genomics approach correlated with the  
145 ISS phenotype. We found that the 11 clustered genes were present in ISS strains (DhA-51 and  
146 PB101) and the strains with intermediate phenotypes (PB120 and PB106) but were absent in the  
147 non-ISS strain WCS365, WCS417 and PB105 (Fig. S2). The remaining 6 genes were all present  
148 in WCS365 and/or other non-ISS strains (Fig. S2). We chose to focus on the 11 ISS-unique  
149 genes (“ISS locus” hereafter) for further study.

150 We found that the 11 genes in the ISS locus are found at a single genomic locus in all 4  
151 of the ISS strains (Fig. S3 and Fig. 2A). The flanking regions are conserved in the non-ISS strain  
152 Pf0-1 (Fig. 2A), indicating a recent insertion or deletion event. Within this locus, there is a single  
153 gene that is conserved in Pf0-1 in addition to two genes that are unique to each individual strain

154 suggesting multiple changes to this genomic region in recent evolutionary history. While all 11  
155 genes are within the same genomic region in the ISS strains, the variability of this locus between  
156 closely related strains suggests it may be rapidly evolving.

157 We surveyed the genomes of sequenced isolates available in our collection for the  
158 presence of the ISS locus. We found a number of closely-related strains from various  
159 environmental sources that contained the ISS locus, as well as a more distantly related strain (Pf-  
160 5) (Fig. 2B). We tested 2 strains that contain the ISS locus (Pf-5 and GW456-L13) as well as 2  
161 that do not (FW300-N1B4 and FW300-N2C3) and found that the presence of the ISS locus  
162 correlated with the ISS phenotype, including the distantly-related strain Pf-5 (Fig. 2C).  
163 Collectively, these data show that the presence of the 11 candidate genes in the ISS locus  
164 identified by our comparative genomics approach is predictive of the ISS phenotype.

165

### 166 **The ISS locus is necessary for ISS**

167 To test if the ISS locus is necessary for ISS strains to induce systemic susceptibility, we  
168 deleted the entire 15 kB locus including the region spanning the 11 genes identified in our initial  
169 comparative genomics screen in strains CH267 and UW4 (Fig. 2A). We tested these deletion  
170 mutants for their ability to induce systemic susceptibility and found that deletion of the entire 11-  
171 gene locus ( $\Delta$ ISSlocus), resulted in a loss of the ISS phenotype in both CH267 and UW4 (Fig.  
172 3A and B). This indicates that the ISS locus is necessary for ISS.

173 The functions of the majority of the genes in the ISS locus are not apparent based on  
174 similarity to genes of known function. A predicted 2544 bp gene was annotated in the CH267  
175 and other genomes as *speE2* due to the similarity of the predicted C-terminus to well-  
176 characterized spermidine synthase gene *speE1* (PputUW4\_02826 and CP336\_12795 in UW4 and



177 CH267, respectively). CH267 *speE2* has similarity to a characterized spermidine synthase gene  
178 *speE* in *P. aeruginosa* [25% predicted amino acid identity to *P. aeruginosa* PA1687 (16)]. A  
179 second *speE*-like gene in the genomes of UW4 and CH267, annotated as *speE1*, is outside of the  
180 ISS locus (PputUW4\_03691 and CP336\_28780 in UW4 and CH267 respectively) and is highly  
181 similar to the *P. aeruginosa speE* gene (~84.0% predicted amino acid identity) (16).

182 To test if the *speE2* gene is necessary for ISS, we also constructed an in-frame deletion of  
183 just the *speE2* gene in both CH267 and UW4. We found that deletion of *speE2* abolished in the  
184 ISS phenotype in both CH267 and UW4 (Fig. 2A and 2B) To determine if *speE2* is the only gene  
185 within the ISS locus that is necessary for induction of ISS, we generated a complementation  
186 plasmid where the CH267 *speE2* gene is expressed under the lac promoter (*p<sub>lac</sub>-speE2*). We  
187 introduced this plasmid into the  $\Delta$ *speE2* deletion and  $\Delta$ ISSlocus deletions in CH267. While *p<sub>lac</sub>-*  
188 *speE2* complemented the CH267  $\Delta$ *speE2* deletion, it failed to complement the  $\Delta$ ISSlocus  
189 deletion (Fig. 3C) indicating that *speE2* is not the only gene within the ISS locus that is required  
190 for ISS.

191 Because deletion of *speE2* in CH267 and UW4 results in the specific loss of the ISS  
192 phenotype, this result indicates that the *speE1* and *speE2* genes are not functionally redundant.  
193 *SpeE1* and *speE2* differ in length and predicted structure (Fig. 4A). *SpeE1* encodes a predicted  
194 384-amino acid protein and contains a predicted polyamine synthase domain with a predicted  
195 decarboxylated S-adenosyl methionine (dSAM) binding motif. *SpeE2* encodes a protein of a  
196 predicted 847 amino acids. Similar to *speE1*, the C-terminus of *speE2* contains a predicted  
197 dSAM-binding domain; however, *SpeE2* contains predicted transmembrane domains at its N-  
198 terminus (Fig. 4A). Spermidine synthases generate spermidine by transferring the aminopropyl  
199 group of dSAM to putrescine. Previous structural and mutagenesis analysis on human and

200 *Thermatoga maritima* SpeE1 enzymes revealed common residues important for catalysis (D276,  
201 D279, D201, and Y177 for the human SpeE1, and the corresponding D173, D176, D101, and  
202 Y76 from the *T. maritima* SpeE1) (17, 18). The catalytic mechanism was proposed to be initiated  
203 by the deprotonation of the putrescine amino group by the conserved aspartic acid D276 or D173  
204 with the aid of the side chains of D201 or D101 and Y177 or Y76 as well as the main chain  
205 carbonyl of L277 or S174, setting up a nucleophilic attack on dcAdoMet. In addition, residue  
206 D279 or D176 is thought to play a role in substrate binding (17, 18).

207 To determine if SpeE2 has the potential to be a spermidine synthase, we performed an  
208 amino acid sequence alignment to see if the catalytic residues from classic spermidine synthases  
209 are conserved in SpeE2. We found that although the tyrosine residue is conserved, SpeE2  
210 consists of different residues at the corresponding aspartic acid positions. The proposed catalytic  
211 residue D276 or D173 in the human or *T. maritima* enzymes corresponds to E624 in SpeE2  
212 while residues D201 or D101 and D279 or D176 have been converted to T556 and P627 (Fig.  
213 4B). Furthermore, we generated a sequence similarity network for SpeE2 with enzymes found in  
214 the PF17284 protein family and found that SpeE2 belongs to a distinct cluster away from any  
215 functionally characterized enzymes (Fig. 4C). Interestingly, the SpeE2 active site residue  
216 substitutions are almost completely conserved within and unique to the SpeE2 cluster (Fig. 4C)  
217 suggesting that while *Pseudomonas* sp. CH267 SpeE2 is unlikely to act as a spermidine synthase  
218 it may have a distinct function.

219

## 220 **Additional roles for the ISS locus in host interactions**

221 While *speE2* is necessary for ISS, the failure of  $\Delta$ *speE2* to complement the 11-gene ISS  
222 locus deletion (Fig. 3C) indicates that at least one other gene in the ISS locus is likely required

223 for ISS. We tested whether *speE2* is always associated with the same larger locus across the  
224 genus *Pseudomonas*. When we analyzed our entire computational dataset of >3800 genomes  
225 from across *Pseudomonas*, we found that there was a strong correlation for the presence or  
226 absence of 9 of 11 genes ( $r > 0.9$ , Fig. 5A). Moreover, we also found that these 9 co-occurring  
227 genes were frequently found in the same genomic region, as there were moderate to strong  
228 correlations for 9 of the 11 genes co-occurring in the same 50-kb genomic region (Fig. 5B).  
229 From a phylogenomic standpoint, we found that these genes were broadly distributed throughout  
230 the *Pseudomonas* genus and co-occurred even in taxonomic groups far outside of the *P.*  
231 *fluorescens* clade (Fig. 5C). Within the *P. fluorescens* clade, the ISS locus genes are frequently  
232 found in some clades, such as the *koreensis* and *jessenii* clades, which contain most of our  
233 isolates (Fig. 5D). However, some clades are missing these genes entirely, such as the plant  
234 associated *corrugata* clade (Fig. 5D). Together, these genomic data indicate that despite their  
235 polyphyletic distribution among divergent clades of *Pseudomonas* spp., the genes in the ISS  
236 locus likely participate in conserved or similar functions.

237         Within the 9 genes that have a high frequency of co-occurrence, we identified a 6 gene  
238 predicted operon in the ISS locus with identical domain structure and organization that is  
239 involved in stress resistance and virulence in *Francisella tularensis* (19) (Fig. 6A). Another  
240 similar operon is associated with aerotolerance and virulence in *Bacteroides fragilis* (20).  
241 Returning to our comparative genomics database, we found that these 6 genes comprise an  
242 operon broadly conserved in the *Pseudomonas* clade that is distinctly paralogous from the 6-gene  
243 operon in the ISS locus (Fig. 6A). This raises the possibility that these six genes within the ISS  
244 locus contribute to host-bacterial interactions across diverse bacterial taxa and both plant and  
245 animal hosts (Fig. 6A).

246 To test if the ISS locus is required for *Pseudomonas* to grow in the Arabidopsis  
247 rhizosphere, we tested the UW4 and CH267  $\Delta$ ISSlocus and  $\Delta$ *speE2* mutants for rhizosphere  
248 growth. We transformed the wildtype and mutant CH267 and UW4 strains with a GFP plasmid  
249 and used a previously described 48-well plate assay to quantify bacterial growth in the  
250 rhizosphere (6). Under these conditions, we observed a significant decrease in rhizosphere  
251 growth of  $\Delta$ ISScluster deletion mutants in both the UW4 and CH267 backgrounds (Fig. 6B). We  
252 found no decrease in rhizosphere colonization by  $\Delta$ *speE2* mutants in either the CH267 or UW4  
253 genetic background (Fig. 6B). Together these data indicate that the ISS locus contributes growth  
254 in the rhizosphere; however, the  $\Delta$ *speE2* mutant has a loss of ISS while retaining normal  
255 rhizosphere growth indicating a dual role in both rhizosphere colonization and ISS for this  
256 genetic locus.

257

## 258 Discussion

259 Plant root-associated (“rhizosphere”) microbes perform a diversity of functions that  
260 benefit their plant hosts including nutrient uptake and defense. Functional characterization of  
261 individual plant-associated bacterial and fungal strains of potential agronomic importance (i.e.  
262 growth promoters or nitrogen fixers) is widespread (5). However, closely-related strains of  
263 bacteria can have very distinct effects on plant growth and defense (13), and these effects can be  
264 dependent on environmental context (1). Lack of known correlations between microbial  
265 genotype and potential effects on plant hosts present a challenge when attempting to infer the  
266 effect that a microbe may have on its plant host from sequence identity alone.

267 Our use of comparative genomics and isolate phenotyping to identify the genetic basis of  
268 a complex microbial-derived trait indicates that this is an effective approach to identifying

269 important microbial traits to improve plant health. For comparative genomics to be effective,  
270 traits should be controlled by single or limited genomic loci, and phylogeny should not be  
271 predictive of function. In this case, a close relative of ISS strains, *Pseudomonas* sp. Pf0-1 (>99%  
272 identical by full length 16S rRNA to the ISS strains) does not affect systemic defenses (Fig. 1),  
273 which allowed us to use comparative genomic to identify the underlying basis. We previously  
274 used this approach to find the genomic basis of a pathogenic phenotype within a clade of  
275 commensals (14). It has been previously observed that phylogeny is not predictive of function  
276 for ISR strains (13) suggesting that comparative genomics may be appropriate to find the basis of  
277 additional plant-associated traits.

278 We found that the ISS locus encodes genes involved in both triggering ISS and  
279 promoting rhizosphere colonization. Loss of the entire locus results in a loss of ISS and a  
280 decrease in growth in the rhizosphere; however, loss of *speE2* impairs ISS but not rhizosphere  
281 growth suggesting that there may be multiple plant-association functions encoded in this locus.  
282 The function of the *speE2* gene and other genes within the ISS locus are not readily apparent  
283 from similarity to previously characterized enzymes. As spermidine and other polyamines should  
284 directly enhance plant resistance through generation of ROS (21), it is possible that the *speE2*  
285 enzyme converts spermidine or another polyamine to a non-defense inducing molecule. The  
286 highly conserved nature of the active-site residues within *speE2*-like genes suggests a novel  
287 function in this enzyme.

288 While enhancement of systemic susceptibility is not an obviously agronomically useful  
289 plant trait, several ISS strains promote growth and enhance resistance to insect pests (6, 7). Using  
290 ISS strains might be beneficial for crops where insects are the primary pressure on crop  
291 productivity. However, the ubiquity of ISS by plant growth-promoting strains illustrates the

292 complexity of host-microbe interactions and should be considered when engineering the  
293 microbiome.

294

## 295 **Materials and Methods**

### 296 **Plant growth conditions**

297 For all experiments, plants were grown in Jiffy-7 peat pellets (Jiffy Products) under a 12 h  
298 light/12 h dark at 22 °C temperature regime. Seeds were surface sterilized by washing with 70%  
299 ethanol for 2 minutes followed by 5 minutes in 10% bleach and 3 washes in sterile water. Seeds  
300 were stored at 4° C until use. Unless otherwise indicated, seeds were sowed in Peat pellets (Jiffy  
301 7) and placed in a growth chamber under 12-hour days and 75 µM cool white fluorescent lights  
302 at 23° C.

303

### 304 **Bacterial growth and 16S rRNA sequencing**

305 *Pseudomonas* strains were cultured in LB or King's B at 28 °C. New *Pseudomonas* strains were  
306 isolated from the roots of wild-grown *Arabidopsis* plants around eastern Massachusetts, USA  
307 and British Columbia, Canada as described (6). New *Pseudomonas* isolates were preliminary  
308 identified based on fluorescence on King's B and confirmed by 16S rRNA sequencing.

| Strain | Genus and species      | Isolated From                  | Location             | Reference  |
|--------|------------------------|--------------------------------|----------------------|------------|
| CH267  | <i>Pseudomonas</i> sp. | <i>Arabidopsis</i> rhizosphere | Cambridge, MA USA    | (6)        |
| CH235  | <i>Pseudomonas</i> sp. | <i>Arabidopsis</i> rhizosphere | Carlisle, MA USA     | (6)        |
| CH229  | <i>Pseudomonas</i> sp. | <i>Arabidopsis</i> rhizosphere | Carlisle, MA USA     | (6)        |
| PB100  | <i>Pseudomonas</i> sp. | <i>Arabidopsis</i> rhizosphere | Vancouver, BC Canada | This study |
| PB101  | <i>Pseudomonas</i> sp. | <i>Arabidopsis</i> rhizosphere | Vancouver, BC Canada | This study |
| PB105  | <i>Pseudomonas</i> sp. | <i>Arabidopsis</i> rhizosphere | Vancouver, BC Canada | This study |
| PB106  | <i>Pseudomonas</i> sp. | <i>Arabidopsis</i> rhizosphere | Vancouver, BC Canada | This study |

|            |                          |                                |                         |            |
|------------|--------------------------|--------------------------------|-------------------------|------------|
| PB120      | <i>Pseudomonas</i> sp.   | <i>Arabidopsis</i> rhizosphere | Eastham, MA USA         | This study |
| WCS417     | <i>P. simiae</i>         | Wheat rhizosphere              | Netherlands             | (22)       |
| UW4        | <i>Pseudomonas</i> sp.   | Reeds                          | Waterloo, ON Canada     | (10)       |
| Pf0-1      | <i>Pseudomonas</i> sp.   | Environmental soil             |                         | (11)       |
| DhA-51     | <i>P. Vancouverensis</i> | Environmental soil             | Vancouver, BC Canada    | (12)       |
| WCS365     | <i>Pseudomonas</i> sp.   | Tomato rhizosphere             | Netherlands             | (23)       |
| Pf-5       | <i>Pseudomonas</i> sp.   | Cotton rhizosphere             | College Station, TX USA | (24)       |
| GW456-L13  | <i>P. fluorescens</i>    | Groundwater                    | Oakridge, TN USA        | (25)       |
| FW300-N1B4 | <i>P. fluorescens</i>    | Groundwater                    | Oakridge, TN USA        | (25)       |
| FW300-N2C3 | <i>P. fluorescens</i>    | Groundwater                    | Oakridge, TN USA        | (25)       |

309 **Table 1. Bacterial strains used in this study**

310

### 311 **ISS assays**

312 ISS and ISR assays were performed as described (7, 26). Briefly, *Pseudomonas* rhizosphere  
313 isolates were grown at 28 °C in LB medium. For inoculation of plant roots for ISR and ISS  
314 assays, overnight cultures were pelleted, washed with 10 mM MgSO<sub>4</sub> and resuspended to a final  
315 OD<sub>600</sub> of 0.02. Jiffy pellets were inoculated 9 days after seed germination with 2 mls of the  
316 indicated bacterial strains at a final OD<sub>600</sub> of 0.02 (5x10<sup>5</sup> CFU g<sup>-1</sup> Jiffy pellet). For infections, the  
317 leaves of 5-week old plants were infiltrated with *Pto* DC3000 at an OD<sub>600</sub> = 0.0002 (starting  
318 inoculum ~10<sup>3</sup> CFU/cm<sup>2</sup> leaf tissue). Plants were maintained under low light (<75 μM) and high  
319 humidity for 48 hours. Leaf punches were harvested, ground, and plated to determine CFU  
320 counts.

321

### 322 **16S rRNA sequencing, bacterial genome sequencing, assembly and phylogenomics**

323 Bacterial DNA preps were performed using Qiagen Purgene Kit A. 16S rRNA was amplified  
324 using 8F and 1391R and sequenced using 907R. Bacterial genomic library prep and genome

325 sequence was performed as described (7). Briefly, bacterial DNA was isolated using Qiagen  
326 Purgene Kit A and sonicated into ~500 bp fragments. Library construction was performed as  
327 described (7), individually indexed and sequenced using MiSeq V3 paired end 300 bp reads.  
328 After barcode splitting, approximately 500,000 to 1 million reads were used for each sample to  
329 assemble draft genomes of the strains *Pseudomonas* sp. CH235, PB100, PB101, PB105, PB106,  
330 PB120 and *P. vancouverensis* DhA-51. Genome assembly was carried out as previously  
331 described (7) and draft genomes are available from NCBI (see below).

332

### 333 **Phylogenomic tree building**

334 To generate the 29-taxon species tree used in Figs. 2B and 4E, we made use of an alignment of  
335 122 single-copy genes we previously found to be conserved in all *Pseudomonas* strains (14).  
336 From this amino acid alignment, we extracted 40,000 positions ignoring sites where >20% of the  
337 taxa had gaps. Using RAxMLv8.2.9, we inferred 20 independent trees under the JTT substitution  
338 model using empirical amino acid frequencies and selected the one with the highest likelihood.  
339 Support values were calculated through 100 independent bootstrap replicates under the same  
340 parameters.

341 To build the 3,886-taxon phylogeny of the *Pseudomonas* genus in Figs. 5C and S1, the  
342 same 122-gene alignment was used. For computational feasibility, the alignment was randomly  
343 subsampled to 10,000 amino acid positions, again ignoring sites that were highly gapped  
344 (>20%). FastTree v2.1.9 was used to build the phylogeny using default parameters. The  
345 phylogeny was rooted to a clade of *Pseudomonas* identified as an outgroup to all other  
346 *Pseudomonas* spp. as previously described (14). To more easily visualize this tree, we collapsed



347 monophyletic clades with strong support (as determined by FastTree's local Shimodaira-  
348 Hasegawa test) that correspond with major taxonomic divisions identified by Hesse et al. (2018).

349 To build the tree for the *Pseudomonas fluorescens* (*Pfl*) subclade seen in Figs. 5D and S2,  
350 we identified 1,873 orthologs specific to the *Pfl* clade found in >99% of all strains in the clade  
351 and then aligned them all to the hidden Markov models generated by PyParanoid using  
352 hmalign, prior to concatenation. This alignment had 581,023 amino acid positions, which we  
353 trimmed to 575,629 positions after masking sites with >10% of taxa with gaps. From this  
354 alignment, we randomly subsampled 120,000 sites for our final phylogenomic dataset. Using  
355 RAxMLv8.2.9, we inferred 20 independent trees under the JTT substitution model using  
356 empirical amino acid frequencies and selected the one with the highest likelihood. Support  
357 values were calculated through 100 independent bootstrap replicates under the same parameters.

358

### 359 **Comparative Genomics**

360 Comparative genomics analyses were performed by using a previously described framework for  
361 identifying PyParanoid pipeline and the database we built for over 3800 genomes of  
362 *Pseudomonas* spp. Briefly, we had previously used PyParanoid to identify 24,066 discrete  
363 groups of homologous proteins which covered >94% of the genes in the original database. Using  
364 these homolog groups, we annotated each protein-coding sequence in the newly sequenced and  
365 merged the resulting data with the existing database, generating presence-absence data for each  
366 of the 24,066 groups for 3,886 total *Pseudomonas* genomes.

367 To identify the groups associated with induction of systemic susceptibility, we compared  
368 the presence-absence data for 4 strains with ISS activity (*Pseudomonas* spp. CH229, CH235,  
369 CH267, and UW-4) and 1 strain with no activity (*Pseudomonas* sp. Pf0-1). We initially

370 suspected that ISS activity was due to the presence of a gene or pathway (i.e. not the absence of a  
371 gene) and thus initially focused on genes present only in Pf0-1. We identified 29 groups that  
372 were present in the 4 ISS strains but not in Pf0-1.

373 To obtain the correlation coefficients in Figs. 4D and 5A, we coded group presence or  
374 absence as a binary variable and calculated Pearson coefficients across all 3,886 genomes. To  
375 calculate the correlation coefficients in Fig. 5B, we split the genomic database into 50-kb  
376 contiguous regions and assessed group presence or absence within each region. Because this  
377 dataset is heavily zero-inflated, we ignored regions that had none of the 11 groups, taking the  
378 Pearson coefficient of the 11 genes over the remaining regions.

379 Initial annotation of the ISS groups was based on generic annotations from GenBank  
380 Further annotation of the 11 groups specific to the ISS locus was carried out using the TMHMM  
381 v2.0 server, the SignalP 4.1 server and a local Pfam search using the Pfam-A database from  
382 Pfam v31.0. To identify homologous genes in the genomes of *Francisella tularensis* subsp.  
383 *holarctica* and *Bacteroides fragilis* YCH46, we relied on locus tags reported in the literature  
384 which we confirmed using annotation based on another Pfam-A domain search.

385

### 386 **Deletion of the *speE2* gene and 11-gene ISS locus**

387 Deletions in the CH267 and UW4 strains were constructed by a two-step allelic exchange as  
388 described (27). The flanking regions directly upstream and downstream of the 11-gene ISS locus  
389 or the *speE2* gene were amplified and joined by overlapping polymerase chain reaction (PCR)  
390 using genomic DNA as template and primers listed in Table 2. Following digest, the product was  
391 ligated into the pEXG2 suicide vector that contains the *sacB* gene for counter-selection on  
392 sucrose (28). The recombinant plasmid was then transformed into calcium-competent *E. coli*

393 DH5 $\alpha$  by heat shock. After confirmation of correct insert by PCR and sequencing, the plasmid  
 394 was transformed into WM3064 (29). Conjugation of plasmid into CH267 and UW4 from  
 395 WM3064 was performed by biparental mating on King's B media supplemented with  
 396 diaminopimelic acid, and transconjugants were selected using 10  $\mu$ g/mL gentamicin and 15  
 397  $\mu$ g/mL nalidixic acid. The second recombination leading to plasmid and target DNA excision  
 398 was selected for by using sucrose counter-selection. Gene deletions in CH267 and UW4 were  
 399 confirmed by PCR amplification of the flanking regions with primers listed in Table 2, agarose  
 400 gel electrophoresis and Sanger sequencing.

401

402 **Table 2. Primers used to generate the mutant *Pseudomonas* strains analyzed in this study.**

| Strain            | Primer type             | Primer name      | Restriction site | Sequence (5'→3')                  |
|-------------------|-------------------------|------------------|------------------|-----------------------------------|
| CH267             | Upstream forward        | CH409            | HindIII          | AAAAAGCTTAGTCGCAACCTCGCCTCGACTGAC |
| $\Delta$ ISSlocus | Upstream reverse        | CH410            | —                | AAACGGGCGGGAGCAGCACTTGG           |
|                   | Downstream forward      | CH411            | —                | CACTGACTCCGCTTATTGTTTTGTGTC       |
|                   | Downstream reverse      | CH412            | EcoRI            | AAAGAATTCTTCACGCCGCCGAGGATGTC     |
|                   | Upstream confirmation   | PB401            | —                | CGCTATGACCTGGGCCGCAACGAA          |
|                   | Downstream confirmation | PB402            | —                | CCGACGCCGACCATGAGCGAAA            |
|                   | CH267                   | Upstream forward | CH413a           | HindIII                           |
| $\Delta$ speE     | Upstream reverse        | CH414a           | —                | CTCTCGTCATCCGATCATTCCCACGCGG      |
|                   | Downstream forward      | CH415            | —                | GAATGATTGTTCCCATGCATAGCGTGG       |
|                   | Downstream reverse      | CH416a           | EcoRI            | AAAGAATTCCCGGGCTCGACTGGTTCCTCCGA  |
|                   | Upstream confirmation   | PB403            | —                | CTACAGCCAACCTCAAGGAGGCCAA         |
|                   | Downstream confirmation | PB404            | —                | CGGGTGAGGTCTCGAACGAGATGT          |
|                   | UW4                     | Upstream forward | CH401            | HindIII                           |
| $\Delta$ ISSlocus | Upstream reverse        | CH402            | —                | GAAAGGCTCCTGCAGAAGATCGAAC         |
|                   | Downstream forward      | CH403            | —                | GTAACACCTCCAAACGTTCCGGGAT         |
|                   | Downstream reverse      | CH404            | EcoRI            | AAAGAATTCAACGCACCTGCACATCGGCTGCG  |
|                   | Upstream confirmation   | PB405            | —                | GGGTCATGTCCCTGACCAGCA             |

|                       |                              |                  |          |                                 |
|-----------------------|------------------------------|------------------|----------|---------------------------------|
|                       | Downstream confirmation      | PB406            | —        | GGGTCTGAATTCCGTGTCGCCAA         |
| UW4                   | Upstream forward             | CH405            | HindIII  | AAAAAGCTTGAGCCGATTGAGCTGGATGCGG |
| <i>ΔspeE</i>          | Upstream reverse             | CH406            | —        | TACGACTTCCATGGTCCAGGTGCG        |
|                       | Downstream forward           | CH407            | —        | TCGGGGGGCTGGCTCAAAGG            |
|                       | Downstream reverse           | CH408            | EcoRI    | AAAGAATTCACGAGTCGGCGCTCAAACGCG  |
|                       | Upstream confirmation        | PB407            | —        | CGCGAACCTGTGGACCAGCGAGTT        |
|                       | Downstream confirmation      | PB408            | —        | CGCGAACC GCGCTGCAAGAA           |
|                       | <i>p<sub>lac</sub>-speE2</i> | Upstream forward | speE_up2 | HindIII                         |
| Downstream reverse    |                              | speE_down1       | BamHI    | AAAGGATCCGGATGACGAGAGTCACTGC    |
| Confirmation primer 1 |                              | PB409            | —        | GGGCGTGTCTGAATACCGGCGA          |
| Confirmation primer 2 |                              | PB410            | —        | GCGCGGCTCGCCGTT                 |
| Confirmation primer 3 |                              | PB411            | —        | CGCCGCCGCGATGGA                 |

403

#### 404 **Complementation of the *speE2* gene**

405 The *speE2* gene was amplified by PCR using CH267 genomic DNA as template, as well as the  
406 primers listed in Table 2. Following restriction digestion, the ~2.6 kb insert was ligated into the  
407 pBBR1MCS-2 vector into the multiple cloning site located downstream of a lac promoter.  
408 Ligation mixture was then introduced into *E. coli* DH5α by heat shock, and transformants were  
409 selected using LB media supplemented with 25-50 μg/mL kanamycin. Presence of correct insert  
410 was confirmed by PCR, restriction digest and Sanger sequencing. pBBR1-MCS2::p<sub>lacZ</sub>-speE2<sub>CDS</sub>  
411 plasmids were maintained in *E. coli* DH5α λpir with 25 μg/mL of Kanamycin. To construct a  
412 conjugating strain, Calcium-competent *E. coli* WM3064 was first transformed with pBBR1-  
413 MCS2::p<sub>lacZ</sub>-speE2<sub>CDS</sub> or pBBR1-MCS2 by heat shock. To conjugate *Pseudomonas* sp. CH267,  
414 1 mL of overnight cultures of *Pseudomonas* sp. CH267 and *E. coli* WM3064 carrying the  
415 appropriate plasmids were washed twice and resuspended with 0.5 mL of 100 mM MgCl<sub>2</sub>. The  
416 resuspended *Pseudomonas* sp. CH267 was mixed with *E. coli* WM3064 strains at 1:2 ratio. Six  
417 25 μL mating spots were placed on LB plates supplemented with 0.3 mM of Diaminopimelic

418 acid (DAP). The mating spots were allowed to dry before incubating at 28°C for 4 hr. The  
419 mating spots were then scraped off and resuspended in 1 mL of 100 mM MgCl<sub>2</sub>. 100 µL of the  
420 suspension was plated on LB-Kanamycin. Colonies were restreaked to confirm antibiotic  
421 resistance.

422

### 423 **Multiple sequence alignment and Sequence Similarity Network (SSN) Generation**

424 Multiple sequence alignment was performed with Clustal Omega (30). The SSN was created  
425 using the enzyme function initiative (EFI-EST) web tool (31) by inputting the SpeE2 amino acid  
426 sequence with the amino acid sequences from the spermidine synthase tetramerization domain  
427 with the code PF17284 using UniRef90 seed sequences instead of the whole family. Sequences  
428 will less than 100 amino acids were also excluded resulting in a total of 6523 sequences. An  
429 alignment score threshold or E-value cutoff of 10<sup>-100</sup> was used to generate the SSN which was  
430 visualized using Cytoscape (32).

431

### 432 **Rhizosphere colonization assay.**

433 *Arabidopsis* seedlings were grown in 48-well plates and rhizosphere growth of bacteria was  
434 quantified as previously described (6). Briefly, *Arabidopsis* seeds were placed individually in 48-  
435 well clear-bottom plates with the roots submerged in hydroponic media (300 µl 0.5× MS media  
436 plus 2% sucrose). The medium was replaced with 270 µl 0.5× MS media with no sucrose on day  
437 10, and plants were inoculated with 30 µl bacteria at an OD<sub>600</sub> of 0.0002 (final OD<sub>600</sub>, 0.00002;  
438 ~1,000 cells per well) on day 12. Plants were inoculated with wild-type *Pseudomonas* CH267 or  
439 UW4 strains containing plasmid pSMC21 (*pTac-GFP*) (33). Fluorescence was measured with a  
440 SpectraMax i3x fluorescence plate reader (Molecular Devices) (481/515 excitation/emission) 5

441 days post inoculation. A standard curve related fluorescence to OD was generated to estimate  
442 CFU/wells ( $OD_{600} = 1 = 5 \times 10^8$  CFU/mL).

443

#### 444 **Acknowledgements**

445 This work was supported by an NSERC Discovery Grant (NSERC-RGPIN-2016-04121) and a  
446 Seeding Food Innovation grant from George Weston Ltd. awarded to C.H.H. Additional support  
447 from a Life Sciences Research Foundation Fellowship from the Simons Foundation awarded to  
448 R.A.M., a fellowship from China Postdoctoral Science Foundation awarded to Y.S., a Chinese  
449 Graduate Scholarship Council Award to Y.L., and an NSERC CGS-M award to Z. L.

450

#### 451 **Author Contributions**

452 C.H., R.A.M., and P.B. designed experiments. P.B. Y.S. Y.L. and C.H.H. performed  
453 experiments. C.H., R.A.M., Z.L. analyzed data and R.A.M. performed genome assembly,  
454 annotation, phylogenetic analysis and comparative genomics. M.H. and K.R. performed  
455 bioinformatic analyses of *speE2* function. C.H.H., P.B. and R.A.M. wrote the manuscript with  
456 input from all.

457

#### 458 **Data Availability**

459 Data for the Whole Genome Shotgun project has been deposited at DDBJ/ENA/GenBank  
460 under the accessions RRZJ000000000 (CH235), RRZK000000000 (DhA-51), RWIM000000000  
461 (PB106), RWIN000000000 (PB120), RWIO000000000 (PB105), RWIQ000000000 (PB100), and  
462 RWIR000000000 (PB101). The versions described in this paper  
463 are versions RRZJ010000000 (CH235), RRZK010000000 (DhA-51), RWIM010000000 (PB106),

464 RWIN01000000 (PB120), RWIO01000000 (PB105), RWIQ01000000 (PB100), and  
465 RWIR01000000 (PB101).

466

467 **Declaration of interests:** The authors declare no competing interests.

468

## 469 **References**

- 470 1. Vacheron J, Desbrosses G, Bouffaud M-L, Touraine B, Moëgne-Loccoz Y, Muller D,  
471 Legendre L, Wisniewski-Dyé F, Prigent-Combaret C. 2013. Plant growth-promoting  
472 rhizobacteria and root system functioning. *Front Plant Sci* 4:356.
- 473 2. Spaepen S, Vanderleyden J, Remans R. 2007. Indole-3-acetic acid in microbial and  
474 microorganism-plant signaling. *FEMS Microbiol Rev* 31:425–448.
- 475 3. Glick BR. 2005. Modulation of plant ethylene levels by the bacterial enzyme ACC  
476 deaminase. *FEMS Microbiol Lett* 251:1–7.
- 477 4. Bangera MG, Thomashow LS. 1999. Identification and characterization of a gene cluster  
478 for synthesis of the polyketide antibiotic 2,4-diacetylphloroglucinol from *Pseudomonas*  
479 *fluorescens* Q2-87. *J Bacteriol* 181:3155–63.
- 480 5. Pieterse CMJ, de Jonge R, Berendsen RL. 2016. The Soil-Borne Supremacy. *Trends Plant*  
481 *Sci* 21:171–173.
- 482 6. Haney CH, Samuel BS, Bush J, Ausubel FM. 2015. Associations with rhizosphere  
483 bacteria can confer an adaptive advantage to plants. *Nat Plants* 1:15051.
- 484 7. Haney CH, Wiesmann CL, Shapiro LR, Melnyk RA, O’Sullivan LR, Khorasani S, Xiao L,  
485 Han J, Bush J, Carrillo J, Pierce NE, Ausubel FM. 2017. Rhizosphere-associated  
486 *Pseudomonas* induce systemic resistance to herbivores at the cost of susceptibility to

- 487 bacterial pathogens. *Mol Ecol* 27:1833–1847.
- 488 8. Huot B, Yao J, Montgomery BL, He SY. 2014. Growth-defense tradeoffs in plants: A  
489 balancing act to optimize fitness. *Mol Plant* 7:1267–1287.
- 490 9. Van Wees SCM, Pieterse CMJ, Trijssenaar A, Van 't Westende YAM, Hartog F, Van  
491 Loon LC. 1997. Differential Induction of Systemic Resistance in *Arabidopsis* by  
492 Biocontrol Bacteria. *Mol Plant-Microbe Interact* 10:716–724.
- 493 10. Shah S, Li J, Moffatt BA, Glick BR. 1998. Isolation and characterization of ACC  
494 deaminase genes from two different plant growth-promoting rhizobacteria. *Can J*  
495 *Microbiol* 44:833–843.
- 496 11. Compeau G, Al-Achi BJ, Platsouka E, Levy SB. 1988. Survival of rifampin-resistant  
497 mutants of *Pseudomonas fluorescens* and *Pseudomonas putida* in soil systems. *Appl*  
498 *Environ Microbiol* 54:2432–8.
- 499 12. Mohn WW, Wilson AE, Bicho P, Moore ERB. 1999. Physiological and Phylogenetic  
500 Diversity of Bacteria Growing on Resin Acids. *Syst Appl Microbiol* 22:68–78.
- 501 13. Berendsen RL, van Verk MC, Stringlis IA, Zamioudis C, Tommassen J, Pieterse CMJ,  
502 Bakker PAHM. 2015. Unearthing the genomes of plant-beneficial *Pseudomonas* model  
503 strains WCS358, WCS374 and WCS417. *BMC Genomics* 16:539.
- 504 14. Melnyk RA, Hossain SS, Haney CH. 2019. Convergent gain and loss of genomic islands  
505 drive lifestyle changes in plant-associated *Pseudomonas*. *ISME J* 13:1575–1588.
- 506 15. Hesse C, Schulz F, Bull CT, Shaffer BT, Yan Q, Shapiro N, Hassan KA, Varghese N,  
507 Elbourne LDH, Paulsen IT, Kyrpides N, Woyke T, Loper JE. 2018. Genome-based  
508 evolutionary history of *Pseudomonas* spp. *Environ Microbiol* 20:2142–2159.
- 509 16. Lu C-D, Itoh Y, Nakada Y, Jiang Y. 2002. Functional analysis and regulation of the



- 510           divergent *spuABCDEFGH-spuI* operons for polyamine uptake and utilization in  
511           *Pseudomonas aeruginosa* PAO1. J Bacteriol 184:3765–73.
- 512 17.   Wu H, Min J, Zeng H, McCloskey DE, Ikeguchi Y, Loppnau P, Michael AJ, Pegg AE,  
513           Plotnikov AN. 2008. Crystal structure of human spermine synthase: Implications of  
514           substrate binding and catalytic mechanism. J Biol Chem 283:16135–16146.
- 515 18.   Wu H, Min J, Ikeguchi Y, Zeng H, Dong A, Loppnau P, Pegg AE, Plotnikov AN. 2007.  
516           Structure and mechanism of spermidine synthases. Biochemistry 46:8331–9.
- 517 19.   Dieppedale J, Sobral D, Dupuis M, Dubail I, Klimentova J, Stulik J, Postic G, Frapy E,  
518           Meibom KL, Barel M, Charbit A. 2011. Identification of a Putative Chaperone Involved  
519           in Stress Resistance and Virulence in *Francisella tularensis*. Infect Immun 79:1428–1439.
- 520 20.   Tang YP, Dallas MM, Malamy MH. 1999. Characterization of the BatI (Bacteroides  
521           aerotolerance) operon in *Bacteroides fragilis*: isolation of a *B. fragilis* mutant with  
522           reduced aerotolerance and impaired growth in *in vivo* model systems. Mol Microbiol  
523           32:139–149.
- 524 21.   O’Neill EM, Mucyn TS, Patteson JB, Finkel OM, Chung E-H, Baccile JA, Massolo E,  
525           Schroeder FC, Dangl JL, Li B. 2018. Phevamine A, a small molecule that suppresses plant  
526           immune responses. Proc Natl Acad Sci 115:E9514–E9522.
- 527 22.   Lamers JG, Schippers B, Geels FP. 1988. Soil-borne diseases of wheat in the Netherlands  
528           and results of seed bacterization with pseudomonads against *Gaeumannomyces graminis*  
529           var. tritici, associated with disease resistance. Cereal Breed Relat to Integr Cereal Prod  
530           134–139.
- 531 23.   Geels FP, Schippers B. 1983. Selection of Antagonistic Fluorescent *Pseudomonas* spp.  
532           and their Root Colonization and Persistence following Treatment of Seed Potatoes. J

- 533           Phytopathol 108:193–206.
- 534   24.   Mohr R, Pavlidis T, Sanfeliu A, IAPR Technical Committee on Syntactical and Structural  
535           Pattern Recognition. 1979. Control of *Rhizoctonia solani* on Cotton Seedlings with  
536           *Pseudomonas fluorescens* and With an Antibiotic Produced by the Bacterium.  
537           Phytopathology viii, 260 p.
- 538   25.   Price MN, Wetmore KM, Waters RJ, Callaghan M, Ray J, Liu H, Kuehl J V., Melnyk RA,  
539           Lamson JS, Suh Y, Carlson HK, Esquivel Z, Sadeeshkumar H, Chakraborty R, Zane GM,  
540           Rubin BE, Wall JD, Visel A, Bristow J, Blow MJ, Arkin AP, Deutschbauer AM. 2018.  
541           Mutant phenotypes for thousands of bacterial genes of unknown function. *Nature*  
542           557:503–509.
- 543   26.   Cecchini N, Song Y, Roychoudhry S, Greenberg J, Haney C. 2019. An Improved  
544           Bioassay to Study Arabidopsis Induced Systemic Resistance (ISR) Against Bacterial  
545           Pathogens and Insect Pests. *BIO-PROTOCOL* 9.
- 546   27.   Liu Z, Beskrovnaya P, Melnyk RA, Hossain SS, Khorasani S, O’Sullivan LR, Wiesmann  
547           CL, Bush J, Richard JD, Haney CH. 2018. A Genome-Wide Screen Identifies Genes in  
548           Rhizosphere-Associated *Pseudomonas* Required to Evade Plant Defenses. *MBio*  
549           9:e00433-18.
- 550   28.   Rietsch A, Vallet-Gely I, Dove SL, Mekalanos JJ. 2005. ExsE, a secreted regulator of type  
551           III secretion genes in *Pseudomonas aeruginosa*. *Proc Natl Acad Sci* 102:8006–8011.
- 552   29.   Hanahan D. 1983. Studies on transformation of *Escherichia coli* with plasmids. *J Mol Biol*  
553           166:557–580.
- 554   30.   Madeira F, Park YM, Lee J, Buso N, Gur T, Madhusoodanan N, Basutkar P, Tivey ARN,  
555           Potter SC, Finn RD, Lopez R. 2019. The EMBL-EBI search and sequence analysis tools

- 556 APIs in 2019. *Nucleic Acids Res* 47:W636–W641.
- 557 31. Gerlt JA, Bouvier JT, Davidson DB, Imker HJ, Sadkhin B, Slater DR, Whalen KL. 2015.  
558 Enzyme function initiative-enzyme similarity tool (EFI-EST): A web tool for generating  
559 protein sequence similarity networks. *Biochim Biophys Acta - Proteins Proteomics*.  
560 Elsevier B.V.
- 561 32. Shannon P, Markiel A, Ozier O, Baliga NS, Wang JT, Ramage D, Amin N, Schwikowski  
562 B, Ideker T. 2003. Cytoscape: A software Environment for integrated models of  
563 biomolecular interaction networks. *Genome Res* 13:2498–2504.
- 564 33. Bloemberg G V, O 'toole GA, Lugtenberg BJJ, Kolter R. 1997. Green Fluorescent Protein  
565 as a Marker for *Pseudomonas* spp. *Appl Environ Microbiol* 63:4543–4551.  
566  
567

568 **Figure Legends**

569

570 **Figure 1. Induced Systemic Susceptibility (ISS) is common among closely-related strains of**  
571 ***Pseudomonas* spp.** Isolates of *Pseudomonas* were tested for their ability to modulate systemic  
572 defenses; bars are colored to indicate % relatedness to CH267 by partial 16S rRNA sequence as  
573 indicated in the key. Data are the average of 3-5 biological replicates with 2 leaves from each of  
574 6 plants (n=12) per experiment. Means +/- SEM are shown. Letters designate levels of  
575 significance (p<0.05) by ANOVA and Tukey's HSD tests.

576

577 **Figure 2. The presence of a genomic island is predictive of the ISS phenotype. (A) A**  
578 genomic island identified through comparative genomics is present in the ISS strains CH229,  
579 CH235, CH267 and UW4 and absent in Pf0-1 (no effect on systemic defense) and WCS417 (ISR  
580 strain). **(B)** Phylogenetic tree based on 122 core *Pseudomonas* genes. Genome sequencing of  
581 new strains shows the island is present in strains that enhance susceptibility but not in those that  
582 trigger ISR or have no effect. **(C)** Two strains with the island (GW456-L13 and Pf-5) and two  
583 without (N1B4 and N2C3) were tested for ISS/ISR. Only those with the island significantly  
584 enhanced susceptibility. Data are the average of 3 biological replicates with 2 leaves from each  
585 of 6 plants (n=12) per experiment. Means +/- SEM are shown. \*p<0.05 by ANOVA and Tukey's  
586 HSD.

587

588 **Figure 3. The ISS locus and *speE2* gene are necessary for ISS. (A-B)** The *speE2* gene and the  
589 entire 11-gene locus were deleted from CH267 (A) and UW4 (B). **(C)** Expression of *speE2* from  
590 a plasmid is sufficient to complement the CH267  $\Delta$ *speE2* mutant but not the  $\Delta$ ISSlocus mutant.

591 Data are the average of 3 biological replicates with 2 leaves from each of 6 plants (n=12) per  
592 experiment. Means +/- SEM are shown. \*p<0.05 by ANOVA and Tukey's HSD.

593

594 **Figure 4. *speE2* is different from characterized spermidine synthases.** (A) The genome of  
595 CH267 contains two *speE* homologues. Both contain predicted d-SAM binding domains and a  
596 spermidine synthase domain. Only SpeE2 contains predicted N-terminal transmembrane  
597 domains. (B) Multiple sequence alignment of predicted amino acid sequence of CH267 SpeE2  
598 and the relatively distantly related Pf-5 SpeE2 gene along with SpeE1-like proteins from CH267,  
599 *E. coli*, *Homo sapiens*, and *Arabidopsis thaliana*. Although the catalytic (blue) and binding-site  
600 (yellow) are conserved in all SpeE1 homologues, both SpeE2 genes have changes in these  
601 regions (gray). (C) Sequence Similarity Network (SSN) of SpeE2 and protein sequences found  
602 with the PFAM domain code PF17284. Sequences that have the conserved residues D201/D101,  
603 D276/D173, and D279/D176 similar to the human and *T. maritima* SpeE1 are colored blue while  
604 sequences that had conserved residues T556, E624, P627 similar to SpeE2 are colored red.  
605 Clusters with only 1 sequence were removed for simplicity.

606

607 **Figure 5. 9 genes in the ISS locus nearly always co-occur and are present across the**  
608 ***Pseudomonas* genus.** (A) Correlation coefficient matrix for 9 genes in the ISS locus across all  
609 3,886 *Pseudomonas* genomes in the comparative genomics database. (B) Correlation coefficient  
610 matrix for the 9 ISS genes across every 50-kb genomic region that contains at least one of the 9  
611 genes. (C) Distribution of the 9 ISS genes across subclades of the *Pseudomonas* genus. (D)  
612 Distribution of the 9 ISS genes within subclades of the *P. fluorescens* group.

613

614 **Figure 6. A conserved subset of genes in the ISS locus contribute to virulence and host**  
615 **association in mammalian pathogens and in *Pseudomonas* spp.** (A) Of the 11 genes in the  
616 ISS locus, 6 are contained within a paralogous operon that is present in CH267 and most other  
617 *Pseudomonas* spp. An operon with a similar configuration is also present in mammalian  
618 pathogens and has been implicated in virulence. (B) The ISS locus, but not the *speE2* gene,  
619 promotes rhizosphere colonization. We tested the  $\Delta$ ISSlocus and  $\Delta$ *speE2* mutant in CH267 and  
620 UW4 using a 48-well plate-based rhizosphere colonization assay. Data shown are from 5 days  
621 post inoculation. \* $p < 0.05$  between mutants in a genetic background by ANOVA and Tukey's  
622 HSD.

623

624 **S1 Table. Unique loci identified in comparative genomics.** The genome content of 4 ISS  
625 strains (CH267, CH235, UW4 and CH229) was compared with the closely-related non-ISS strain  
626 Pf0-1. 17 predicted protein-coding genes were identified.

627

628 **Figure S1. Correlation matrix of 16S rRNA similarity of new *Pseudomonas* isolates from**  
629 **the *Arabidopsis* rhizosphere.** Isolates were selected based on similarity (>97% identical by  
630 partial 16S rRNA) to CH267 (CH235, PB101 and PB106) or distance (<97% identity by partial  
631 16S rRNA) to CH267 (PB120, PB100, PB105). Isolates from the rhizosphere of *Arabidopsis*  
632 growing in \*Massachusetts, USA or #British Columbia, Canada.

633

634 **Figure S2. Distribution of loci identified by comparative genomics ISS loci across**  
635 ***Pseudomonas* strains.** Comparative genomics between ISS strains UW4, CH229, CH235 and  
636 CH267 (black arrows) and non-ISS strain Pf0-1 (red arrow) identified 17 predicted protein-

637 coding genes >100 aa that were absent in Pf0-1 and present in strains that induce ISS. 11 of these  
638 genes were found in a single genomic locus (box) and were absent in the non-ISS strain  
639 WCS365.

640

641 **Figure S3. The ISS locus is highly variable between closely-related strains**

642 The 11 genes in the ISS locus are present in the ISS strains Pf0-1, CH235, CH267 and CH299  
643 but absent in Pf0-1. Genes in the ISS locus are colored as in the key at the bottom of the figure  
644 and in Fig. 2. Conserved genes not unique to the ISS strains are colored similarly among strains;  
645 genes in gray are not conserved between strains at this locus. In CH229, Pf0-1 and CH267 the  
646 genes flanking the ISS locus are conserved in the same orientation suggesting a recent insertion  
647 or deletion event.

% 16S rRNA identity to CH267

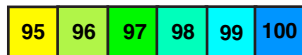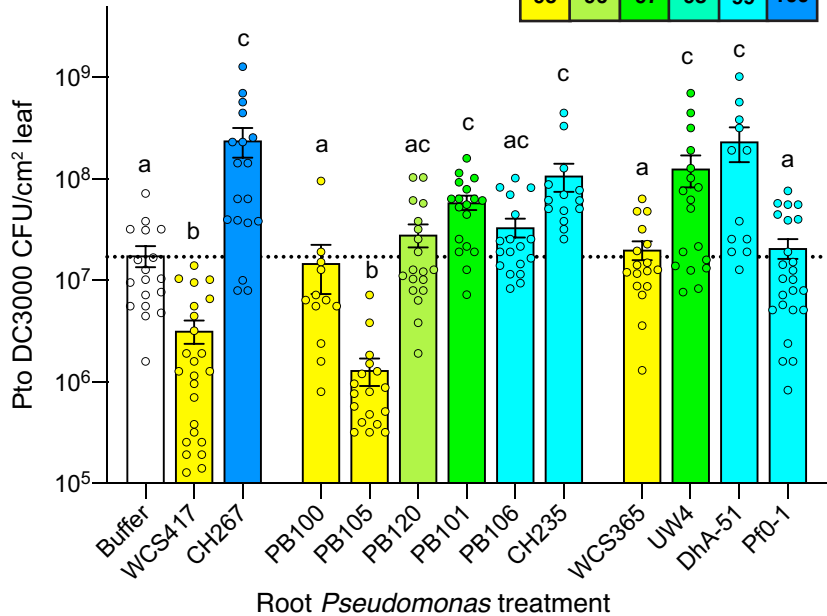



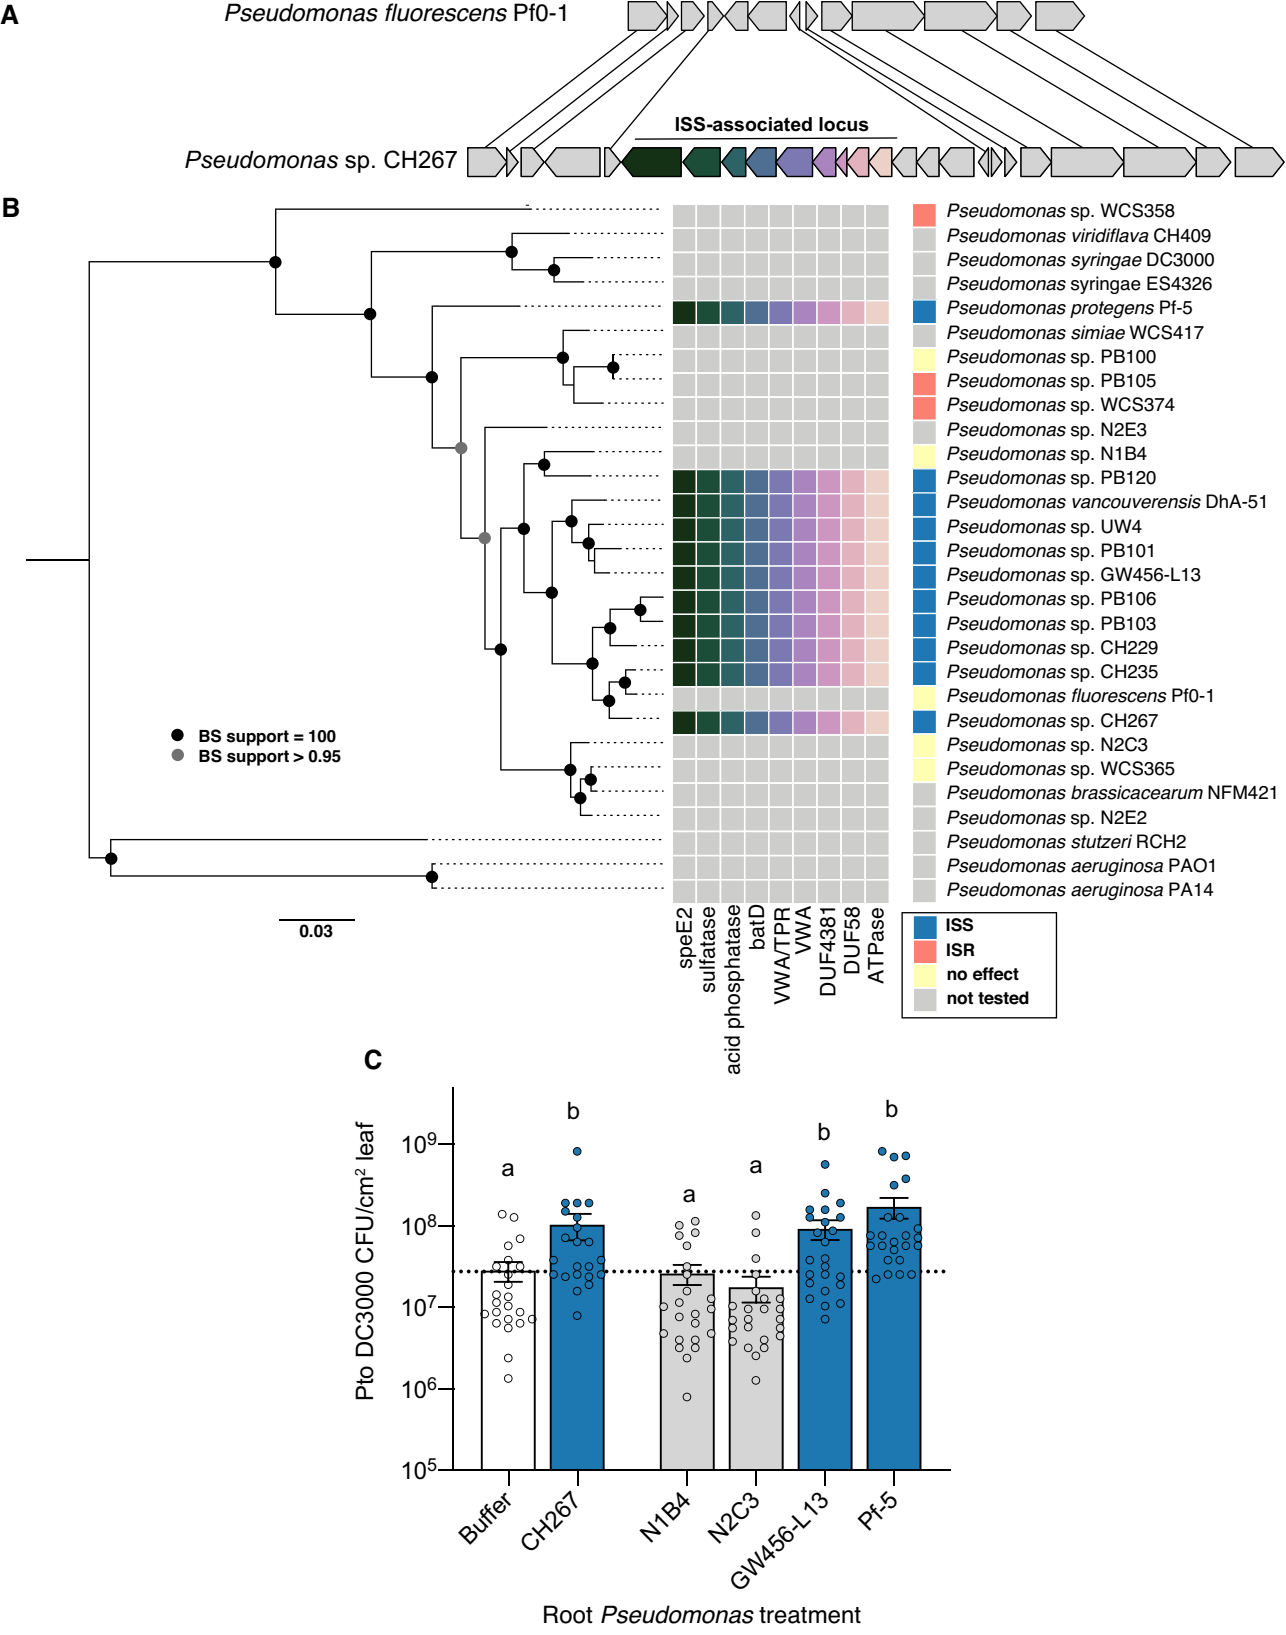

**A**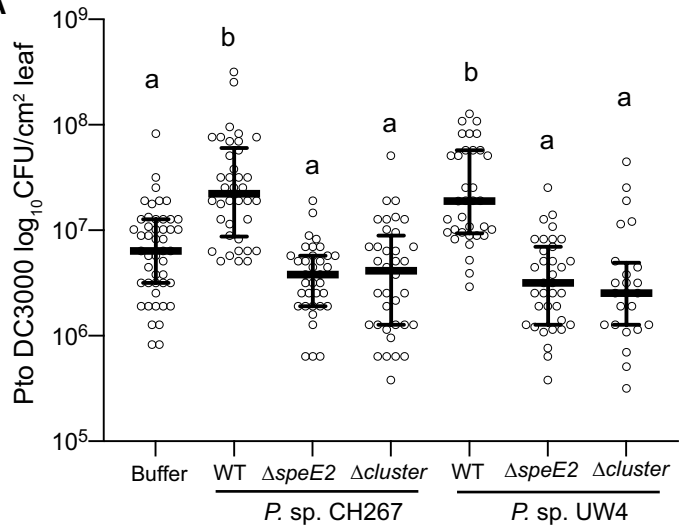**B**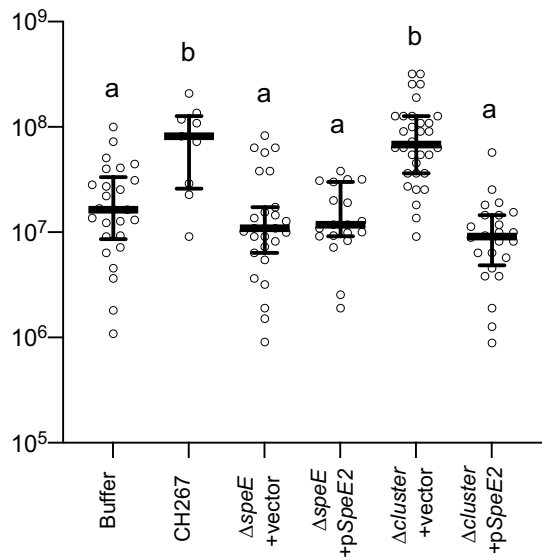

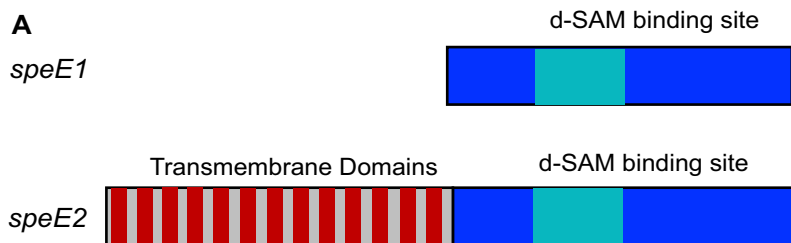

**B**

|            |                                                                                                                                                      |     |
|------------|------------------------------------------------------------------------------------------------------------------------------------------------------|-----|
| CH267SpeE2 | GDAMPSLR <b>Y</b> MRIQALLPLLIHNGEPRSALVIG <b>F</b> G <b>T</b> GITAGALLRYPGLEHRVVAELLPSV                                                              | 581 |
| Pf5SpeE2   | GDAMPSLR <b>Y</b> MRIQALLPLLIHNGEPRSALVIG <b>F</b> G <b>T</b> GITAGALLRYPGLEQRVVAELLPAV                                                              | 569 |
| CH267SpeE1 | TE-ADEFI <b>Y</b> HEMLTHVPILAH-GTAKRVLIIG <b>G</b> G <b>D</b> GGMLREVTKHASVEHITMVEIDGTV                                                              | 115 |
| EcSpeE     | TE-RDEFI <b>Y</b> HEMMTHVPLLAH-GHAKHVLII <b>G</b> G <b>D</b> GAMLREVT <b>R</b> HKNVESITMVEIDAGV                                                      | 113 |
| HsSpeE     | TE-RDEF <b>S</b> YQEMIANLPLCSH-PNPRKVLII <b>G</b> G <b>D</b> GGVLREVVKHPSVESV <b>V</b> QCEIDEDV                                                      | 129 |
| AtSpeE     | TE-RDEC <b>A</b> YQEMITHLPLCSI-SNPKKVLII <b>G</b> G <b>D</b> GGVLREVARHSSVEQIDICEIDK <b>M</b> V                                                      | 125 |
|            | : . * . : : : * : . * : * * : : : . : * * : *                                                                                                        |     |
|            |                                                                                                                                                      |     |
| CH267SpeE2 | IKAAPLFKGNFNAA--SDPGVDVRLRDGRQELLRS-PQTYDLIT <b>L</b> E <b>P</b> P <b>P</b> P <b>S</b> AAGVVNLYS                                                     | 638 |
| Pf5SpeE2   | LDAAPLFQGNFNAA--SDPGIQIRLQDGRQELLRS-PQNYDLIT <b>L</b> E <b>P</b> P <b>P</b> P <b>S</b> AAGVVNLYS                                                     | 626 |
| CH267SpeE1 | VDMCKEFLPNHSGAYDDPRLNLVIDDGMRFVATT-TEKFDV <b>I</b> IS <b>D</b> <b>S</b> T <b>D</b> P <b>I</b> GP <b>G</b> -EVLFS                                     | 173 |
| EcSpeE     | VSFCRQYLPNHNAGSYDDPRFKLVIDDGVNFVNQT-SQTFDV <b>I</b> IS <b>D</b> <b>C</b> T <b>D</b> P <b>I</b> GP <b>G</b> -ESLFT                                    | 171 |
| HsSpeE     | IQVSKKFLPGMAIG-YSSSKLTLHVGDFEFMK <b>Q</b> N-QDAFDV <b>I</b> IT <b>D</b> <b>S</b> <b>S</b> <b>D</b> PMGPA-ESL <b>F</b> K                              | 186 |
| AtSpeE     | VDVAKQYFPNVAVG-YEDPRVNLII <b>G</b> DGVAF <b>L</b> KNA <b>A</b> EGTYDAV <b>I</b> VD <b>S</b> <b>S</b> <b>D</b> P <b>I</b> GP <b>A</b> -KEL <b>F</b> E | 183 |
|            | : . . : . . . . : : * : : * : : * . . * :                                                                                                            |     |

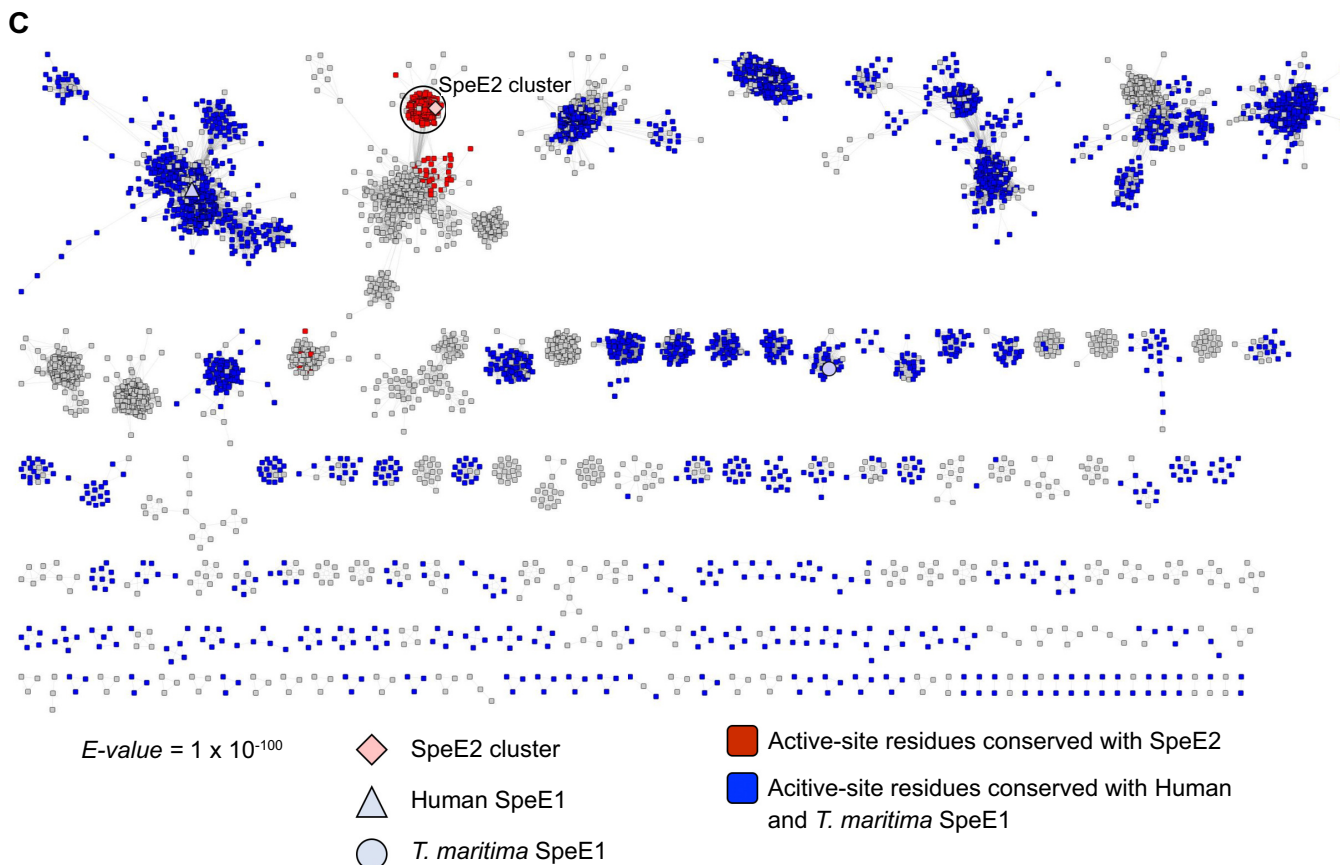

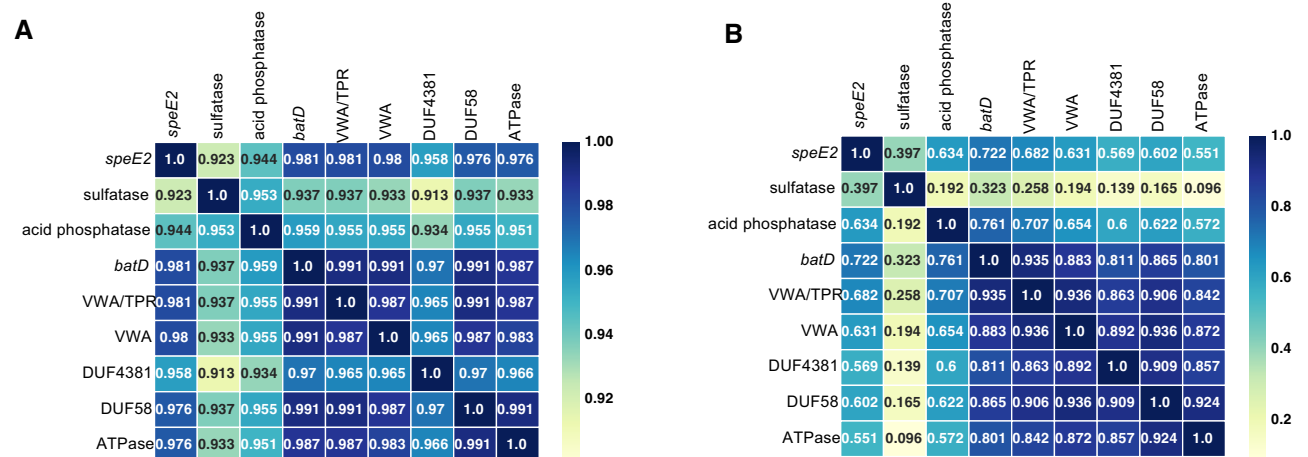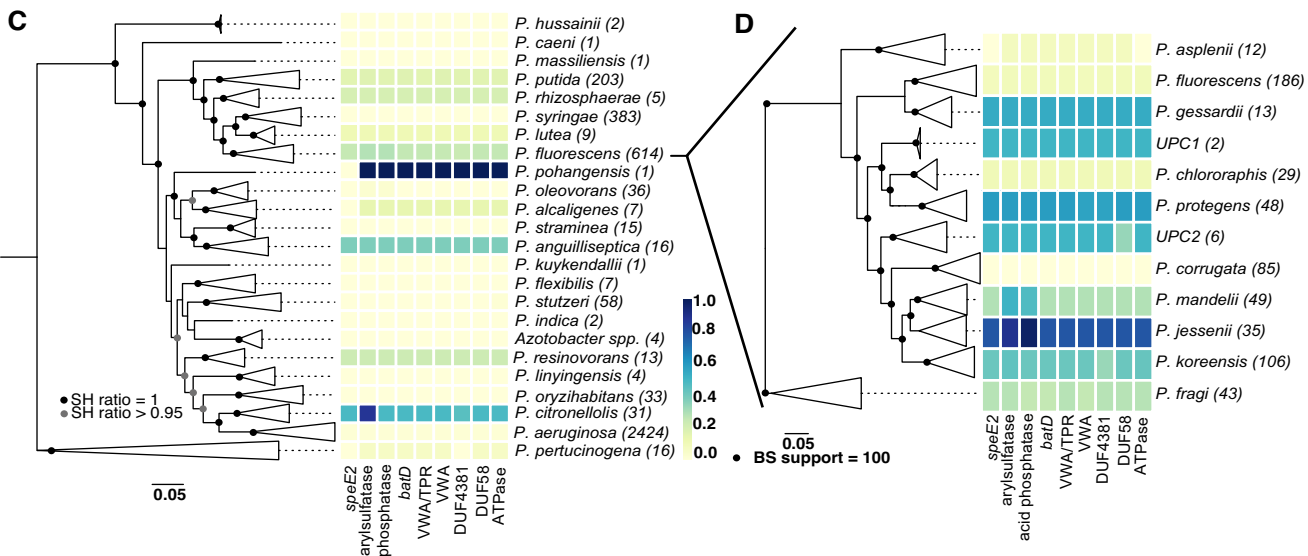

**A**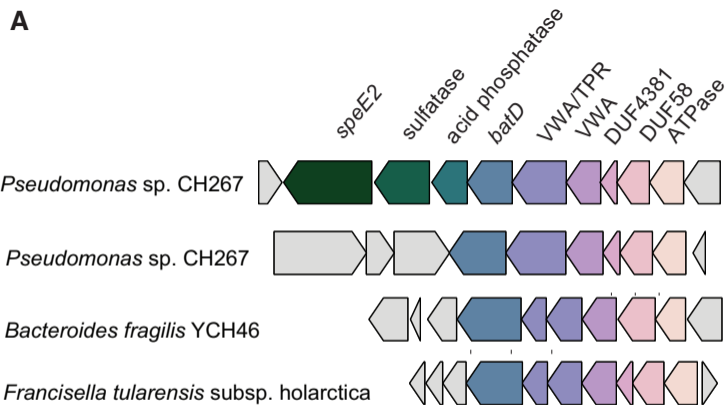**B**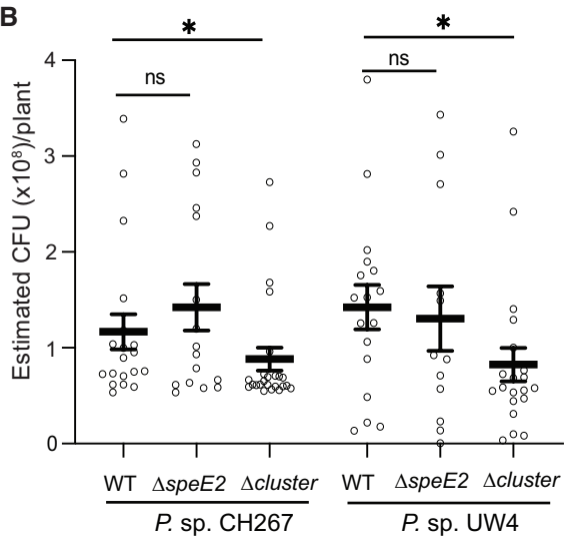

Source: https://www.biorxiv.org/content/10.1101/517870v2.full.pdf
